# Supplementary material for: Evaluation of the Potential of Sewage Sludge Mycobiome to Degrade High Diclofenac and Bisphenol-A Concentrations
Source: MDPI journal article supplement (doi:10.3390/toxics9060115), 2021-05-23
Supplement: s1 [file s1]

# Supplementary Materials: Evaluation of the Potential of Sewage Sludge Mycobiome to Degrade High Diclofenac and Bisphenol-A Concentrations

Ulises Conejo-Saucedo, Alejandro Ledezma-Villanueva, Gabriela Ángeles de Paz, Mario Herrero-Cervera, Concepción Calvo and Elisabet Aranda

**Table S1.** The composition of the bacterial community (genus) detected at <0.5% abundance in sewage sludge samples.

| Family              | Genus                     |
|---------------------|---------------------------|
| Rhodobacteraceae    | <i>Rhodobacter</i>        |
|                     | <i>Paracoccus</i>         |
| Clostridiaceae      | <i>Clostridium</i>        |
|                     | <i>Proteiniclasticum</i>  |
| Methanobacteriaceae | <i>Methanobrevibacter</i> |
|                     | <i>Methanosphaera</i>     |
|                     | <i>Methanobacterium</i>   |
| Geobacteraceae      | <i>Geobacter</i>          |
| Peptococcaceae      | <i>Pelotomaculum</i>      |
| Sphingomonadaceae   | <i>Novosphingobium</i>    |
|                     | <i>Sphingopyxis</i>       |
| Rhodocyclaceae      | <i>Dechloromonas</i>      |
|                     | <i>Azospira</i>           |
|                     | <i>Propionivibrio</i>     |
|                     | <i>Sulfuritalea</i>       |
| Dietziaceae         | <i>Dietzia</i>            |
| Intrasporangiaceae  | <i>Phycococcus</i>        |
| Beijerinckiaceae    | <i>Chelatococcus</i>      |
| Spirochaetaceae     | <i>Treponema</i>          |
| Comamonadaceae      | <i>Acidovorax</i>         |
|                     | <i>Comamonas</i>          |
|                     | <i>Hydrogenophaga</i>     |
|                     | <i>Rhodoferrax</i>        |
|                     | <i>Rubrivivax</i>         |
| Planctomycetaceae   | <i>Planctomyces</i>       |
| Hyphomicrobiaceae   | <i>Hyphomicrobium</i>     |
|                     | <i>Devosia</i>            |
|                     | <i>Rhodoplanes</i>        |
| Nocardioideaceae    | <i>Nocardioideae</i>      |
| Microbacteriaceae   | <i>Leucobacter</i>        |
|                     | <i>Cryocolla</i>          |
| Anaerolineaceae     | <i>Anaerolinea</i>        |
|                     | <i>Longilinea</i>         |
| Syntrophaceae       | <i>Desulfomonile</i>      |
|                     | <i>Syntrophobacter</i>    |
| Caulobacteraceae    | <i>Brevundimonas</i>      |
|                     | <i>Phenylobacterium</i>   |
| Enterococcaceae     | <i>Enterococcus</i>       |
| Eubacteriaceae      | <i>Acetobacterium</i>     |

|                     |                                     |
|---------------------|-------------------------------------|
|                     | <i>Pseudoramibacter Eubacterium</i> |
|                     | <i>Gracilibacter</i>                |
| Methanospirillaceae | <i>Methanospirillum</i>             |
| Thermotogaceae      | <i>Kosmotoga</i>                    |
| Bacteroidaceae      | <i>Bacteroides</i>                  |
| Porphyromonadaceae  | <i>Macellibacteroides</i>           |
|                     | <i>Paludibacter</i>                 |
|                     | <i>Petrimonas</i>                   |
| Xanthomonadaceae    | <i>Dokdonella</i>                   |
|                     | <i>Luteimonas</i>                   |
|                     | <i>Pseudoxanthomonas</i>            |
|                     | <i>Stenotrophomonas</i>             |
|                     | <i>Thermomonas</i>                  |
| Isosphaeraceae      | <i>Nostocoida</i>                   |
| Mogibacteriaceae    | <i>Anaerovorax</i>                  |
| Phyllobacteriaceae  | <i>Aminobacter</i>                  |
|                     | <i>Chelativorans</i>                |
|                     | <i>Mesorhizobium</i>                |
| Acetobacteraceae    | <i>Roseomonas</i>                   |
| Desulfovibrionaceae | <i>Desulfovibrio</i>                |
| Turicibacteraceae   | <i>Turicibacter</i>                 |
| Cloacamonaceae      | <i>Candidatus Cloacamonas</i>       |
| Coxiellaceae        | <i>Aquicella</i>                    |
|                     | <i>Legionella</i>                   |
|                     | <i>Tatlockia</i>                    |
| Rhodospirillaceae   | <i>Defluviicoccus</i>               |
|                     | <i>Dongia</i>                       |
|                     | <i>Reyranella</i>                   |
| Gordoniaceae        | <i>Gordonia</i>                     |
| Corynebacteriaceae  | <i>Corynebacterium</i>              |
| Bdellovibrionaceae  | <i>Bdellovibrio</i>                 |
| Moraxellaceae       | <i>Acinetobacter</i>                |
| Lachnospiraceae     | <i>Anaerostipes</i>                 |
|                     | <i>Blautia</i>                      |
|                     | <i>Butyrivibrio</i>                 |
|                     | <i>Coprococcus</i>                  |
|                     | <i>Roseburia</i>                    |
| Ruminococcaceae     | <i>Faecalibacterium</i>             |
|                     | <i>Gemmiger</i>                     |
|                     | <i>Oscillospira</i>                 |
|                     | <i>Ruminococcus</i>                 |
| Chthoniobacteraceae | <i>Candidatus Xiphiematobacter</i>  |
| Enterococcaceae     | <i>Enterococcus</i>                 |
|                     | <i>Lactococcus</i>                  |
|                     | <i>Streptococcus</i>                |
| Halomonadaceae      | <i>Halomonas</i>                    |
| Actinomycetaceae    | <i>Actinomyces</i>                  |
| Methanoregulaceae   | <i>Methanolinea</i>                 |
| Tissierellaceae     | <i>Gallicola</i>                    |
|                     | <i>Sedimentibacter</i>              |
|                     | <i>Tissierella_Soehngenina</i>      |

|                          |                                  |
|--------------------------|----------------------------------|
| Neisseriaceae            | <i>Uruburuella</i>               |
| Bifidobacteriaceae       | <i>Bifidobacterium</i>           |
| Gemmataceae              | <i>Gemmata</i>                   |
| Rhizobiaceae             | <i>Kaistia</i>                   |
|                          | <i>Shinella</i>                  |
|                          | <i>Sinorhizobium</i>             |
| Methanomassiliicoccaceae | <i>Methanomassiliicoccus</i>     |
| Veillonellaceae          | <i>Acidaminococcus</i>           |
|                          | <i>Anaeromusa</i>                |
|                          | <i>Anaerovibrio</i>              |
|                          | <i>Phascolarctobacterium</i>     |
|                          | <i>Succinispira</i>              |
|                          | <i>Veillonella</i>               |
| Chitinophagaceae         | <i>Niabella</i>                  |
| Desulfobulbaceae         | <i>Desulfobulbus</i>             |
| Coriobacteriaceae        | <i>Collinsella</i>               |
| Dehalobacteriaceae       | <i>Dehalobacterium</i>           |
| Prevotellaceae           | <i>Prevotella</i>                |
| Xanthobacteraceae        | <i>Blastochloris</i>             |
|                          | <i>Xanthobacter</i>              |
| Parachlamydiaceae        | <i>Candidatus Protochlamydia</i> |
| Leptotrichiaceae         | <i>Sebaldella</i>                |
| Burkholderiaceae         | <i>Burkholderia</i>              |
| Brucellaceae             | <i>Ochrobactrum</i>              |
| Weeksellaceae            | <i>Cloacibacterium</i>           |
| Criblamydiaceae          | <i>Estrella</i>                  |
| Flavobacteriaceae        | <i>Flavobacterium</i>            |
| Pirellulaceae            | <i>Pirellula</i>                 |
| Beutenbergiaceae         | <i>Salana</i>                    |
| Rikenellaceae            | <i>Alistipes</i>                 |
| Alcaligenaceae           | <i>Bordetella</i>                |
| Microthrixaceae          | <i>Candidatus Microthrix</i>     |
| Pseudomonadaceae         | <i>Pseudomonas</i>               |
| Odoribacteraceae         | <i>Butyricimonas</i>             |
| Verrucomicrobiaceae      | <i>Luteolibacter</i>             |
|                          | <i>Prostheco bacter</i>          |
| Erysipelotrichaceae      | <i>Eubacterium</i>               |
| Nocardiaceae             | <i>Rhodococcus</i>               |
| Geodermatophilaceae      | <i>Blastococcus</i>              |
